# Supplementary material
Source: PubMed Central journal article supplement (PMC6418499)

**Supplement 1:** OVID Medline Database search strategy – dated April 17<sup>th</sup>, 2018

Database: OVID Medline Epub Ahead of Print, In-Process & Other Non-Indexed Citations, Ovid MEDLINE(R) Daily and Ovid MEDLINE(R) 1946 to Present

- 1 exp 4-Hydroxycoumarins/ or warfarin/ or acenocoumarol/ or dicoumarol/ or Coumarins/ or coumarin anticoagulant/ or ethyl biscoumacetate/ or phenprocoumon/ or phenindione/ (36575)
- 2 vitamin K antagonist\$.mp. (4273)
- 3 (4-Hydroxycoumarins or warfarin or acenocoumarol or nicoumalone or sinthrome or Sintrom or phenindione or dicoumarol or coumadin or phenprocoumon or phepromaron or ethyl-biscoumacetate or phenindione or Diphenadione or Tiocloamarol or Racumi or Marcoumar or Marcumar or Falithrom or Coumadin or Jantoven or vitamin K antagonist\$ or VKA or fluindione or difenacoum or coumatetralyl).mp. (36095)
- 4 1 or 2 or 3 (49833)
- 5 randomized controlled trial.pt. (509749)
- 6 controlled clinical trial.pt. (98335)
- 7 Clinical Trials as topic.sh. (198218)
- 8 trial.ti,ab. (552150)
- 9 factorial\*.ti,ab. (25616)
- 10 (crossover\* or cross over\*).ti,ab. (81760)
- 11 ((doubl\* or singl\*) adj blind\*).ti,ab. (163635)
- 12 (assign\* or allocat\* or volunteer\* or placebo\*).ti,ab. (733581)
- 13 placebo.ab. (205379)
- 14 random\*.ti,ab. (1023794)
- 15 or/5-14 (2010789)
- 16 animals/ not humans/ (4825745)
- 17 exp Animals, Laboratory/ (918068)
- 18 exp Animal Experimentation/ (9412)
- 19 exp Models, Animal/ (565644)
- 20 exp Rodentia/ (3374239)
- 21 (rat or rats or mouse or mice).ti. (1364821)
- 22 or/16-21 (5766718)
- 23 15 not 22 (1790397)
- 24 exp vitamin k/ (15718)
- 25 (vitamin K or phytonadione or Mephyton).mp. (24260)
- 26 24 or 25 (24260)
- Annotation: Vitamin K administration
- 27 4 and 23 and 26 (1633)

**Supplement 2: Flow diagram of study selection**

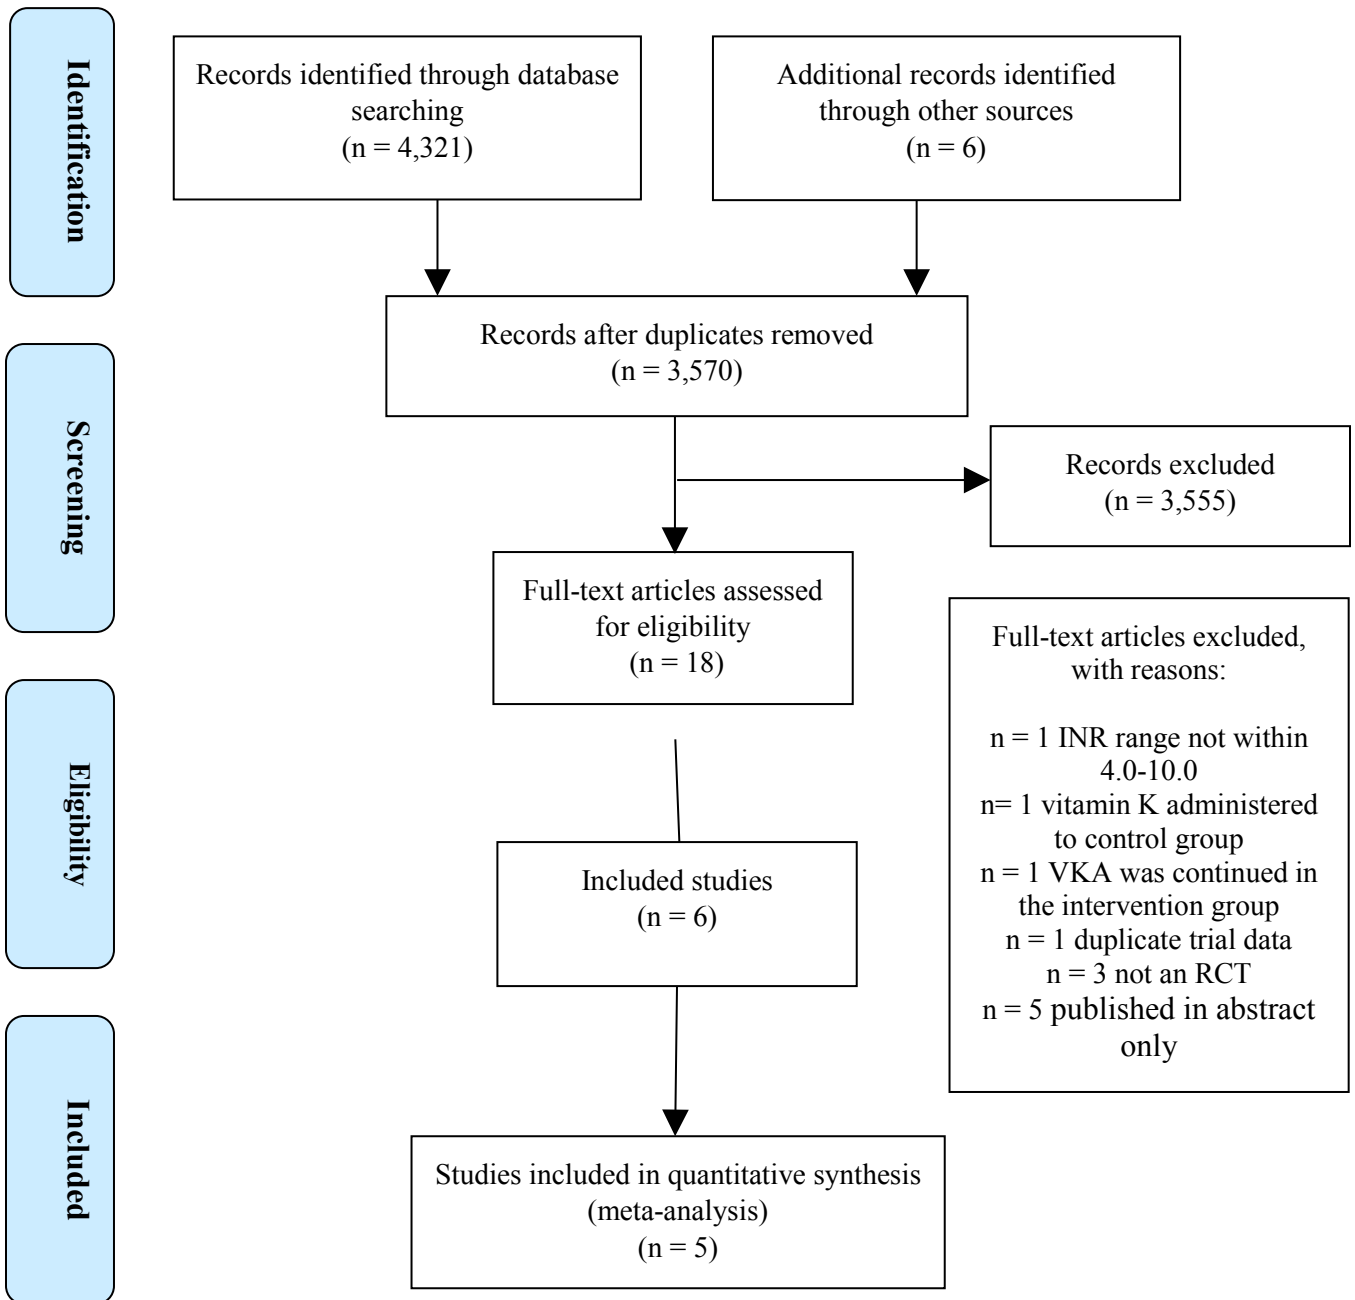

Supplement: ba025163-suppl1.pdf [file ba025163-suppl1.pdf]
